# Supplementary material for: Synthesis and Experimental Validation of New Designed Heterocyclic Compounds with Antiproliferative Activity versus Breast Cancer Cell Lines MCF-7 and MDA-MB-231
Source: Hindawi journal article supplement (doi:10.1155/2017/9729284), 2017-01-01
Supplement: f1 [file 9729284.f1.pdf]

## Supporting Information

### **Synthesis and experimental validation of new designed heterocyclic compounds with antiproliferative activity *versus* breast cancer cell line.**

**Vincenza Barresi<sup>1</sup>, Carmela Bonaccorso<sup>2</sup>, Domenico A. Cristaldi<sup>2</sup>, Maria N. Modica<sup>3</sup>, Nicolò Musso<sup>1</sup>, Valeria Pittalà<sup>3</sup>, Loredana Salerno<sup>3</sup> and Cosimo G. Fortuna<sup>2</sup>**

<sup>1</sup> *Department of Biomedical and Biotechnological Sciences, University of Catania, Viale A. Doria 6, 95125, Catania, Italy*

<sup>2</sup> *Department of Chemical Sciences, University of Catania, Viale A. Doria 6, 95125, Catania, Italy*

<sup>3</sup> *Department of Drug Sciences, University of Catania, Viale A. Doria 6, 95125, Catania, Italy*

Correspondence should be addressed to Valeria Pittalà; [vpittala@unict.it](mailto:vpittala@unict.it) or Andrea Cristaldi; [acristaldi@unict.it](mailto:acristaldi@unict.it)

## **Table of Contents:**

**Figure S1.** PLS scores plot of Indole derivatives.

**Figure S2.** PLS scores plot of Benziloxindole derivatives.

**Figure S3.** PLS scores plot of Quinoline derivatives.

**Figure S4.** PLS scores plot of LCAPs derivatives.

**Figure S5.** PLS scores plot of Pyrimidinketone derivatives.

**Table S1.** Chemical structures of Pyrimidinketone derivatives.

**Table S2.** Chemical structures of Pyrrolopyrimidindione derivatives I.

**Table S3.** Chemical structures of Pyrrolopyrimidindione derivatives IIa.

**Table S4.** Chemical structures of Pyrrolopyrimidindione derivatives IIb.

**Table S5.** Chemical structures of Pyrrolopyrimidindione derivatives III.

**Table S6.** Chemical structures of Benziloxindole derivatives.

**Table S7.** Chemical structures of Indole derivatives.

**Table S8.** Chemical structures of LCAPs derivatives.

**Table S9.** Chemical structures of Quinoline derivatives.

**Table S10.** Chemical structures of Thiophene derivatives.

**Table S11.** Elemental analyses for compounds **2-19**.

### PLS scores plot

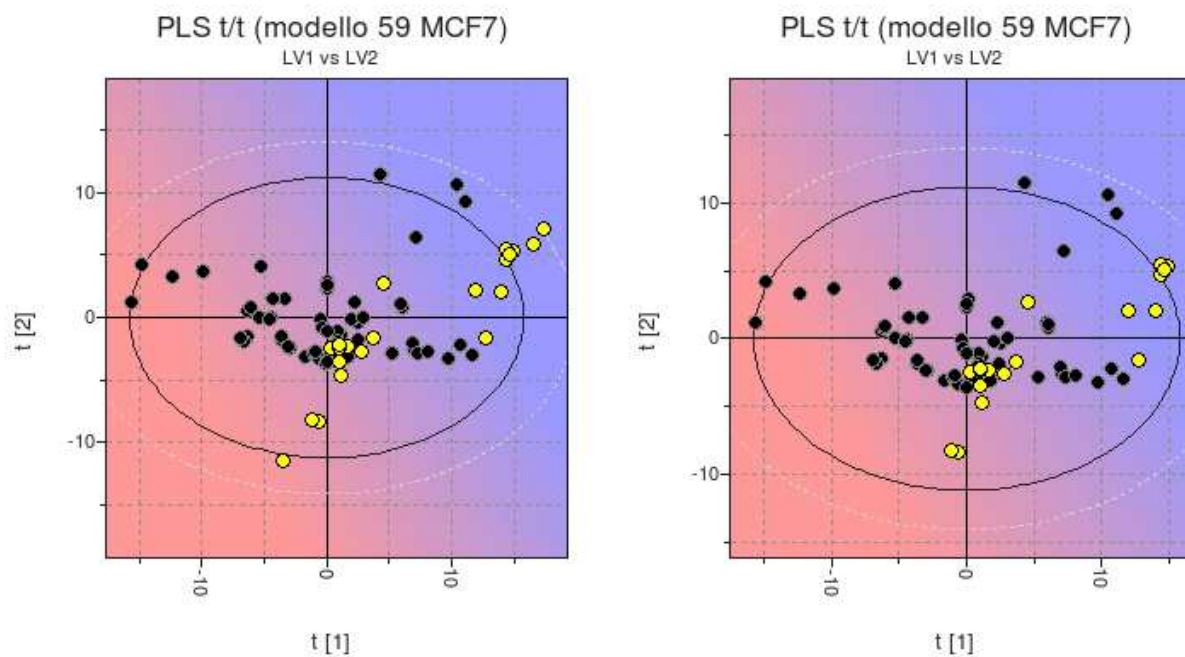

**Figure S1.** PLS scores plot of Indole derivatives: all compounds (left); after outlier or borderline elimination (right).

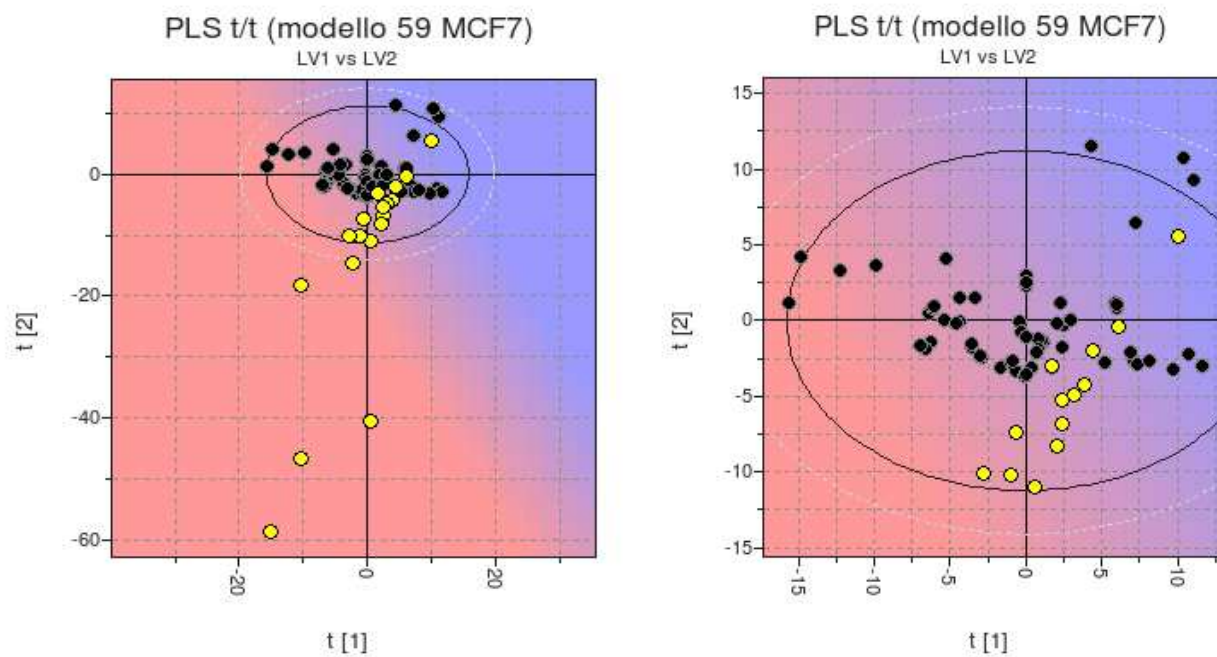

**Figure S2.** PLS scores plot of Benziloxindole derivatives: all compounds (left); after outlier or borderline elimination (right).

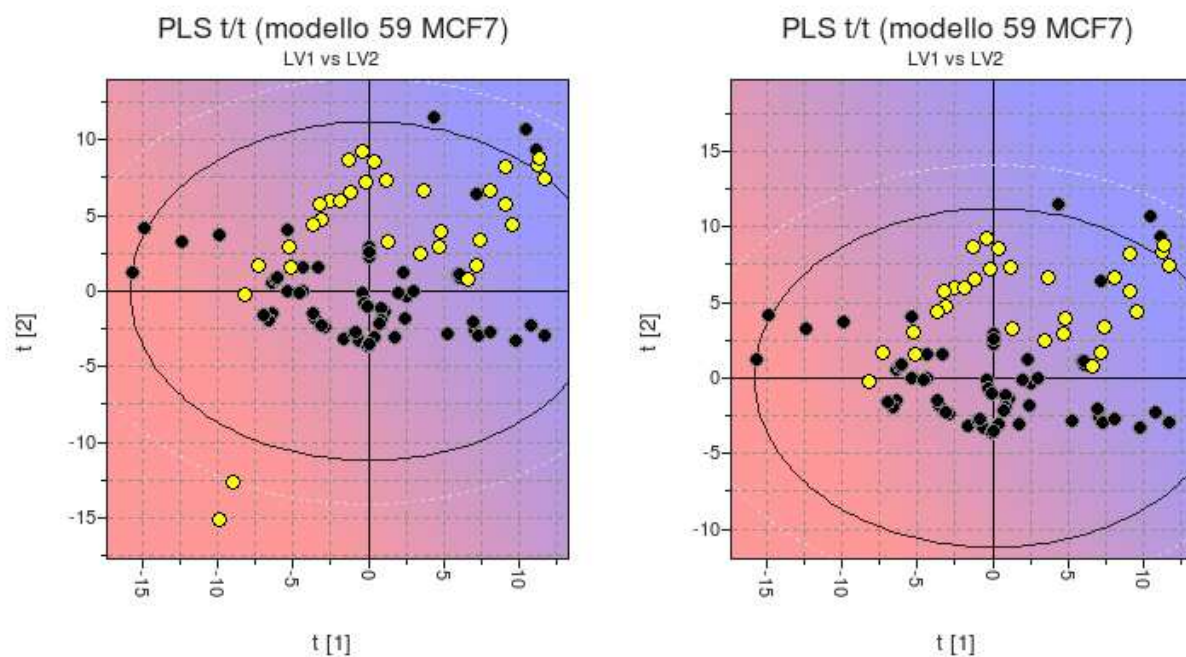

**Figure S3.** PLS scores plot of Quinoline derivatives: all compounds (left); after outlier or borderline elimination (right).

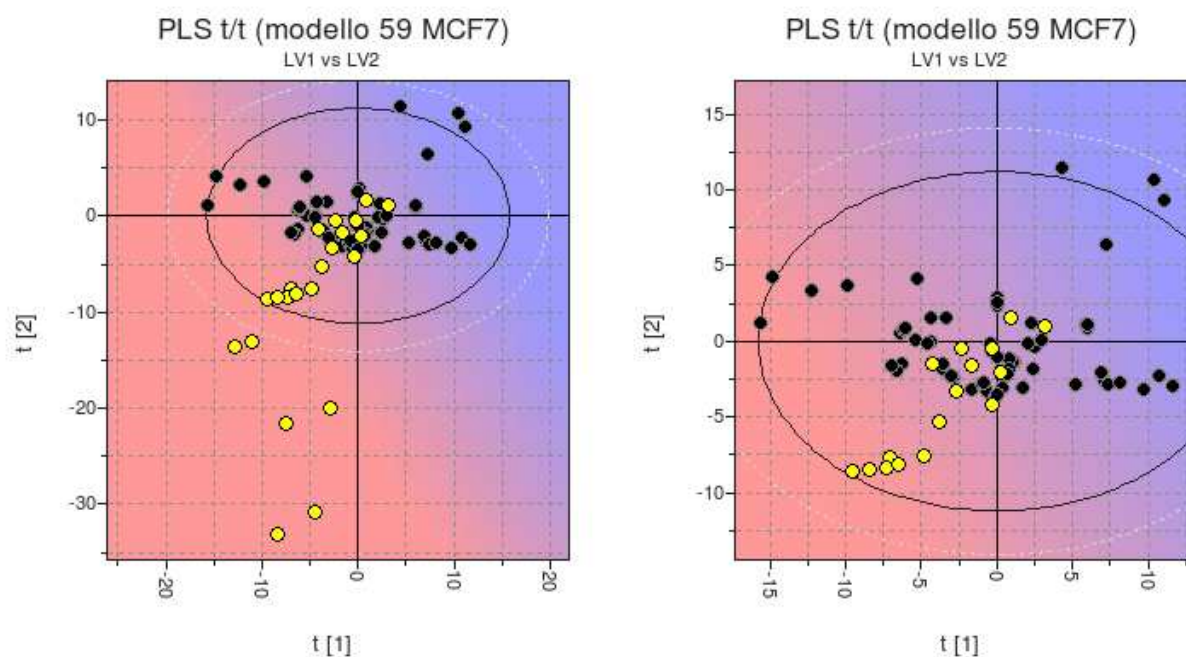

**Figure S4.** PLS scores plot of LCAPs derivatives: all compounds (left); after outlier or borderline elimination (right).

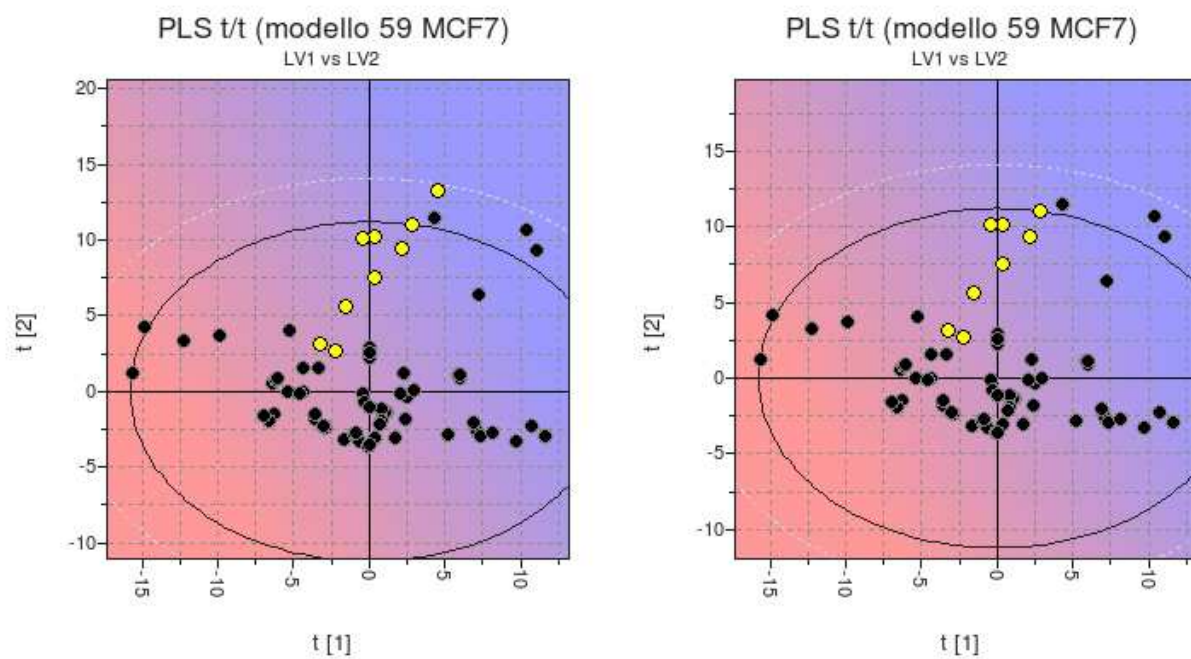

**Figure S5.** PLS scores plot of Pyrimidinketone derivatives: all compounds (left); after outlier or borderline elimination (right).

## Chemical structures of 176 derivatives

**Table S1.** Chemical structures of Pyrimidinketone derivatives.

|   | PYRIMIDINKETONES DERIVATIVES                                                       |                                                                                   |                                                                                    |                                                                                     |
|---|------------------------------------------------------------------------------------|-----------------------------------------------------------------------------------|------------------------------------------------------------------------------------|-------------------------------------------------------------------------------------|
|   | A                                                                                  | B                                                                                 | C                                                                                  | D                                                                                   |
| 2 | 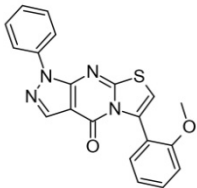  |  |  |  |
| 3 |   |  |  |  |
| 4 |  |                                                                                   |                                                                                    |                                                                                     |

**Table S2.** Chemical structures of Pyrrolopyrimidindione derivatives I.

|   | PYRROLOPYRIMIDINDIONE DERIVATIVES I                                                 |                                                                                      |
|---|-------------------------------------------------------------------------------------|--------------------------------------------------------------------------------------|
|   | A                                                                                   | B                                                                                    |
| 2 | 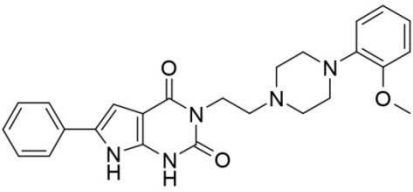   |    |
| 3 |    |    |
| 4 |    |    |
| 5 |  |  |
| 6 |  |  |
| 7 |  |  |
| 8 |  |  |

**Table S3.** Chemical structures of Pyrrolopyrimidindione derivatives IIa.

|    | PYRROLOPYRIMIDINDIONE DERIVATIVES II |   |
|----|--------------------------------------|---|
|    | A                                    | B |
| 2  |                                      |   |
| 3  |                                      |   |
| 4  |                                      |   |
| 5  |                                      |   |
| 6  |                                      |   |
| 7  |                                      |   |
| 8  |                                      |   |
| 9  |                                      |   |
| 10 |                                      |   |



**Table S4.** Chemical structures of Pyrrolopyrimidindione derivatives IIb.

| PYRROLOPYRIMIDINDIONE DERIVATIVES II |   |   |
|--------------------------------------|---|---|
|                                      | A | B |
| 11                                   |   |   |
| 12                                   |   |   |
| 13                                   |   |   |

**Table S5.** Chemical structures of Pyrrolopyrimidindione derivatives III.

| PYRROLOPYRIMIDINDIONE DERIVATIVES III |   |   |   |
|---------------------------------------|---|---|---|
|                                       | A | B | C |
| 2                                     |   |   |   |
| 3                                     |   |   |   |
| 4                                     |   |   |   |
| 5                                     |   |   |   |
| 6                                     |   |   |   |
| 7                                     |   |   |   |
| 8                                     |   |   |   |
| 9                                     |   |   |   |

**Table S6.** Chemical structures of Benziloxindole derivatives.

|   | BENZILOXYINDOLE DERIVATIVES |   |   |
|---|-----------------------------|---|---|
|   | A                           | B | C |
| 2 |                             |   |   |
| 3 |                             |   |   |
| 4 |                             |   |   |
| 5 |                             |   |   |
| 6 |                             |   |   |
| 7 |                             |   |   |

**Table S7.** Chemical structures of Indole derivatives.

|   | INDOLE DERIVATIVES                                                                  |                                                                                     |                                                                                     |                                                                                      |                                                                                       |
|---|-------------------------------------------------------------------------------------|-------------------------------------------------------------------------------------|-------------------------------------------------------------------------------------|--------------------------------------------------------------------------------------|---------------------------------------------------------------------------------------|
|   | A                                                                                   | B                                                                                   | C                                                                                   | D                                                                                    | E                                                                                     |
| 2 | 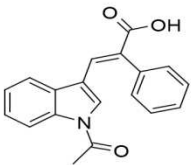   |    |    |    |    |
| 3 |    |    |    |    |    |
| 4 |   |   |   |   |   |
| 5 |  |  |  |  |  |
| 6 |                                                                                     |                                                                                     |                                                                                     |  |  |

**Table S8.** Chemical structures of LCAPs derivatives.

|   | LCAPs |   |   |
|---|-------|---|---|
|   | A     | B | C |
| 2 |       |   |   |
| 3 |       |   |   |
| 4 |       |   |   |
| 5 |       |   |   |
| 6 |       |   |   |
| 7 |       |   |   |
| 8 |       |   |   |
| 9 |       |   |   |

**Table S9.** Chemical structures of Quinoline derivatives.

|    | QUINOLINE DERIVATIVES                                                               |                                                                                     |                                                                                     |                                                                                       |
|----|-------------------------------------------------------------------------------------|-------------------------------------------------------------------------------------|-------------------------------------------------------------------------------------|---------------------------------------------------------------------------------------|
|    | A                                                                                   | B                                                                                   | C                                                                                   | D                                                                                     |
| 2  | 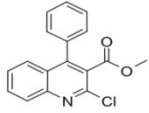   |    |    |                                                                                       |
| 3  |    |    |    |                                                                                       |
| 4  |    |    |    |                                                                                       |
| 5  |    |    |    |                                                                                       |
| 6  |   |   |   |                                                                                       |
| 7  |  |  |  |  |
| 8  |  |  |  |  |
| 9  |  |  |  |  |
| 10 |  |  |  |  |

**Table S10.** Chemical structures of Thiophene derivatives.

|   | Thiophene derivatives                                                               |                                                                                     |                                                                                       |
|---|-------------------------------------------------------------------------------------|-------------------------------------------------------------------------------------|---------------------------------------------------------------------------------------|
|   | A                                                                                   | B                                                                                   | C                                                                                     |
| 2 | 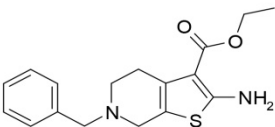   |    |    |
| 3 |    |    |    |
| 4 |    |    |    |
| 5 |    |    |    |
| 6 |  |  |  |

**Table S11.** Elemental analyses for compounds **2-19**.

| Comp.     | MW<br>Molecular Formula                                                           | C%<br>Calc.<br>Found | H%           | N%             | S%           |
|-----------|-----------------------------------------------------------------------------------|----------------------|--------------|----------------|--------------|
| <b>2</b>  | 392.43<br>C <sub>20</sub> H <sub>16</sub> N <sub>4</sub> O <sub>3</sub> S         | 61.21<br>61.03       | 4.11<br>4.26 | 14.28<br>14.29 | 8.17<br>8.22 |
| <b>3</b>  | 392.43<br>C <sub>20</sub> H <sub>16</sub> N <sub>4</sub> O <sub>3</sub> S         | 61.21<br>60.92       | 4.11<br>4.14 | 14.28<br>14.32 | 8.17<br>8.28 |
| <b>4</b>  | 392.43<br>C <sub>20</sub> H <sub>16</sub> N <sub>4</sub> O <sub>3</sub> S         | 61.21<br>60.97       | 4.11<br>4.14 | 14.28<br>14.40 | 8.17<br>8.06 |
| <b>5</b>  | C <sub>20</sub> H <sub>16</sub> N <sub>4</sub> O <sub>2</sub> S<br>376.43         | 63.81<br>63.48       | 4.28<br>4.25 | 14.88<br>14.72 | 8.52<br>8.66 |
| <b>6</b>  | C <sub>19</sub> H <sub>13</sub> N <sub>5</sub> O <sub>4</sub> S<br>407.40         | 56.01<br>55.87       | 3.22<br>3.48 | 17.19<br>17.32 | 7.87<br>7.70 |
| <b>7</b>  | C <sub>19</sub> H <sub>13</sub> N <sub>5</sub> O <sub>4</sub> S<br>407.40         | 56.01<br>56.08       | 3.22<br>3.40 | 17.19<br>17.03 | 7.87<br>7.91 |
| <b>8</b>  | C <sub>19</sub> H <sub>13</sub> ClN <sub>4</sub> O <sub>2</sub> S<br>396.85       | 57.50<br>57.26       | 3.30<br>3.38 | 14.12<br>14.56 | 8.08<br>7.98 |
| <b>9</b>  | C <sub>19</sub> H <sub>13</sub> BrN <sub>4</sub> O <sub>2</sub> S<br>441.30       | 51.71<br>52.08       | 2.97<br>2.93 | 12.70<br>12.55 | 7.27<br>7.00 |
| <b>10</b> | C <sub>19</sub> H <sub>13</sub> FN <sub>4</sub> O <sub>2</sub> S<br>380.39        | 59.99<br>60.22       | 3.44<br>3.36 | 14.73<br>14.62 | 8.43<br>8.28 |
| <b>11</b> | C <sub>20</sub> H <sub>14</sub> N <sub>4</sub> O <sub>2</sub> S<br>374.41         | 64.16<br>64.28       | 3.77<br>3.90 | 14.96<br>15.15 | 8.56<br>8.60 |
| <b>12</b> | C <sub>20</sub> H <sub>14</sub> N <sub>4</sub> O <sub>2</sub> S<br>374.41         | 64.16<br>64.35       | 3.77<br>3.79 | 14.96<br>15.02 | 8.56<br>8.31 |
| <b>13</b> | C <sub>20</sub> H <sub>14</sub> N <sub>4</sub> O <sub>2</sub> S<br>374.41         | 64.16<br>63.99       | 3.77<br>4.02 | 14.96<br>15.01 | 8.56<br>8.89 |
| <b>14</b> | C <sub>20</sub> H <sub>14</sub> N <sub>4</sub> OS<br>358.41                       | 67.02<br>66.74       | 3.94<br>3.88 | 15.63<br>15.54 | 8.95<br>8.89 |
| <b>15</b> | C <sub>19</sub> H <sub>11</sub> N <sub>5</sub> O <sub>3</sub> S<br>389.38         | 58.61<br>58.47       | 2.85<br>2.83 | 17.99<br>18.03 | 8.23<br>8.15 |
| <b>16</b> | C <sub>19</sub> H <sub>11</sub> N <sub>5</sub> O <sub>3</sub> S<br>389.38         | 58.61<br>58.45       | 2.85<br>2.82 | 17.99<br>17.99 | 8.23<br>8.09 |
| <b>17</b> | C <sub>19</sub> H <sub>11</sub> ClN <sub>4</sub> OS · ½H <sub>2</sub> O<br>387.83 | 58.83<br>58.81       | 2.83<br>2.85 | 14.43<br>14.30 | 8.26<br>8.12 |
| <b>18</b> | C <sub>19</sub> H <sub>11</sub> BrN <sub>4</sub> OS<br>423.28                     | 53.91<br>53.69       | 2.62<br>2.59 | 13.24<br>13.36 | 7.58<br>7.30 |
| <b>19</b> | C <sub>19</sub> H <sub>11</sub> FN <sub>4</sub> OS<br>362.38                      | 62.97<br>62.46       | 3.06<br>3.09 | 15.46<br>15.19 | 8.85<br>8.81 |
